# Supplementary material
Source: PubMed Central journal article supplement (PMC5094309)

# Supplementary Figure 1

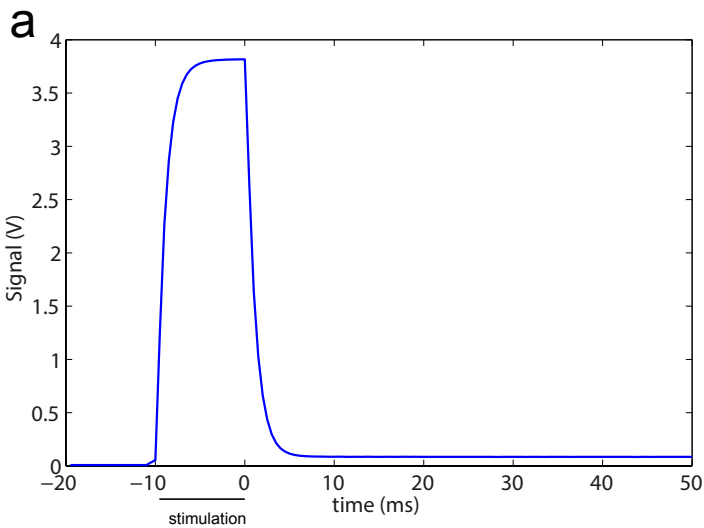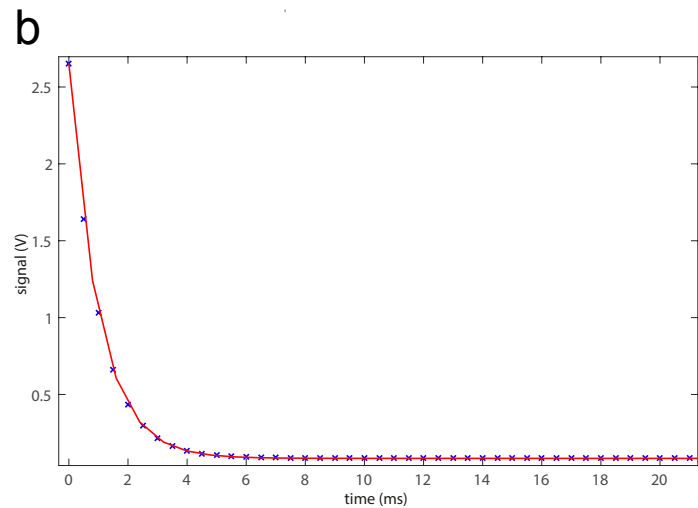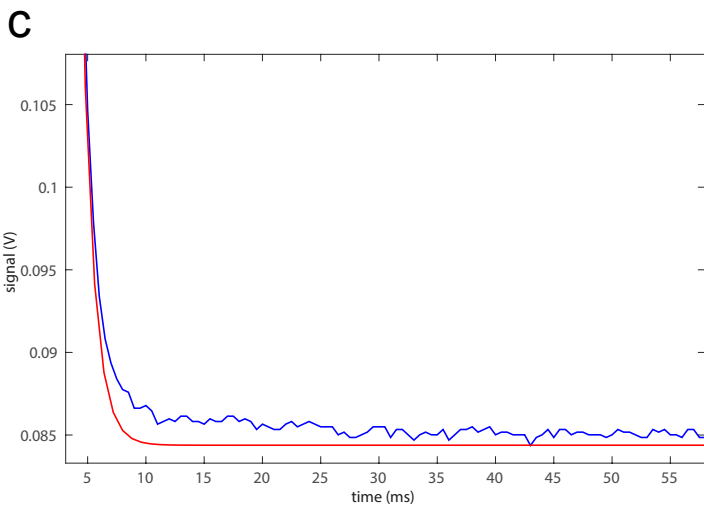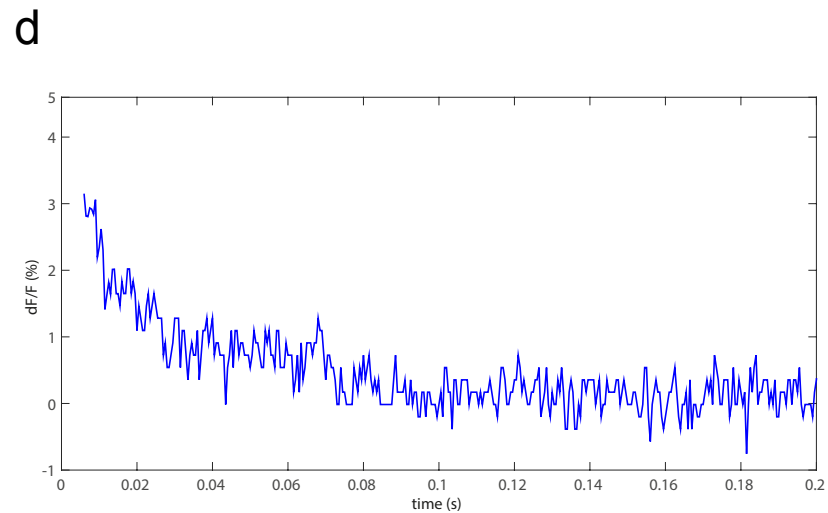

Supplement: SupplFig1.pdf [file SupplFig1.pdf]

Supplementary Figure 2

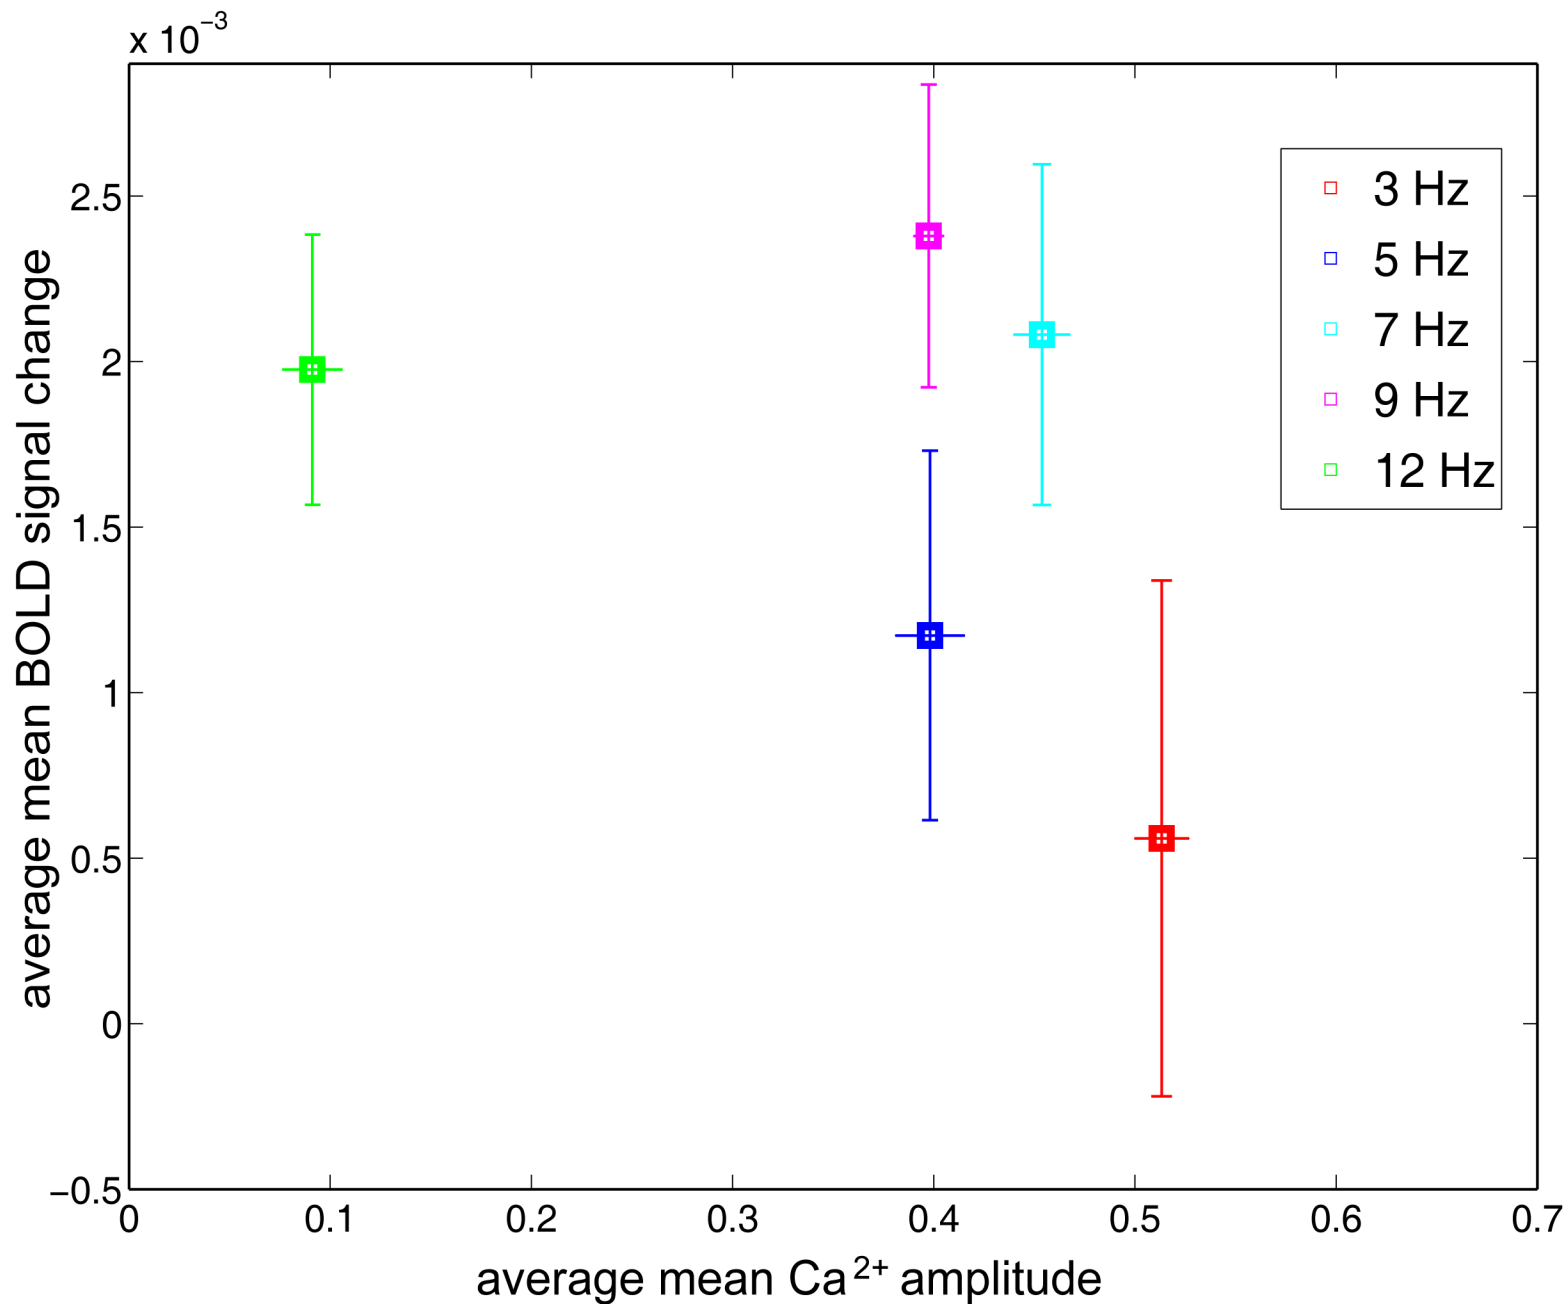

Supplement: SupplFig2.pdf [file SupplFig2.pdf]

# Supplementary Figure 3

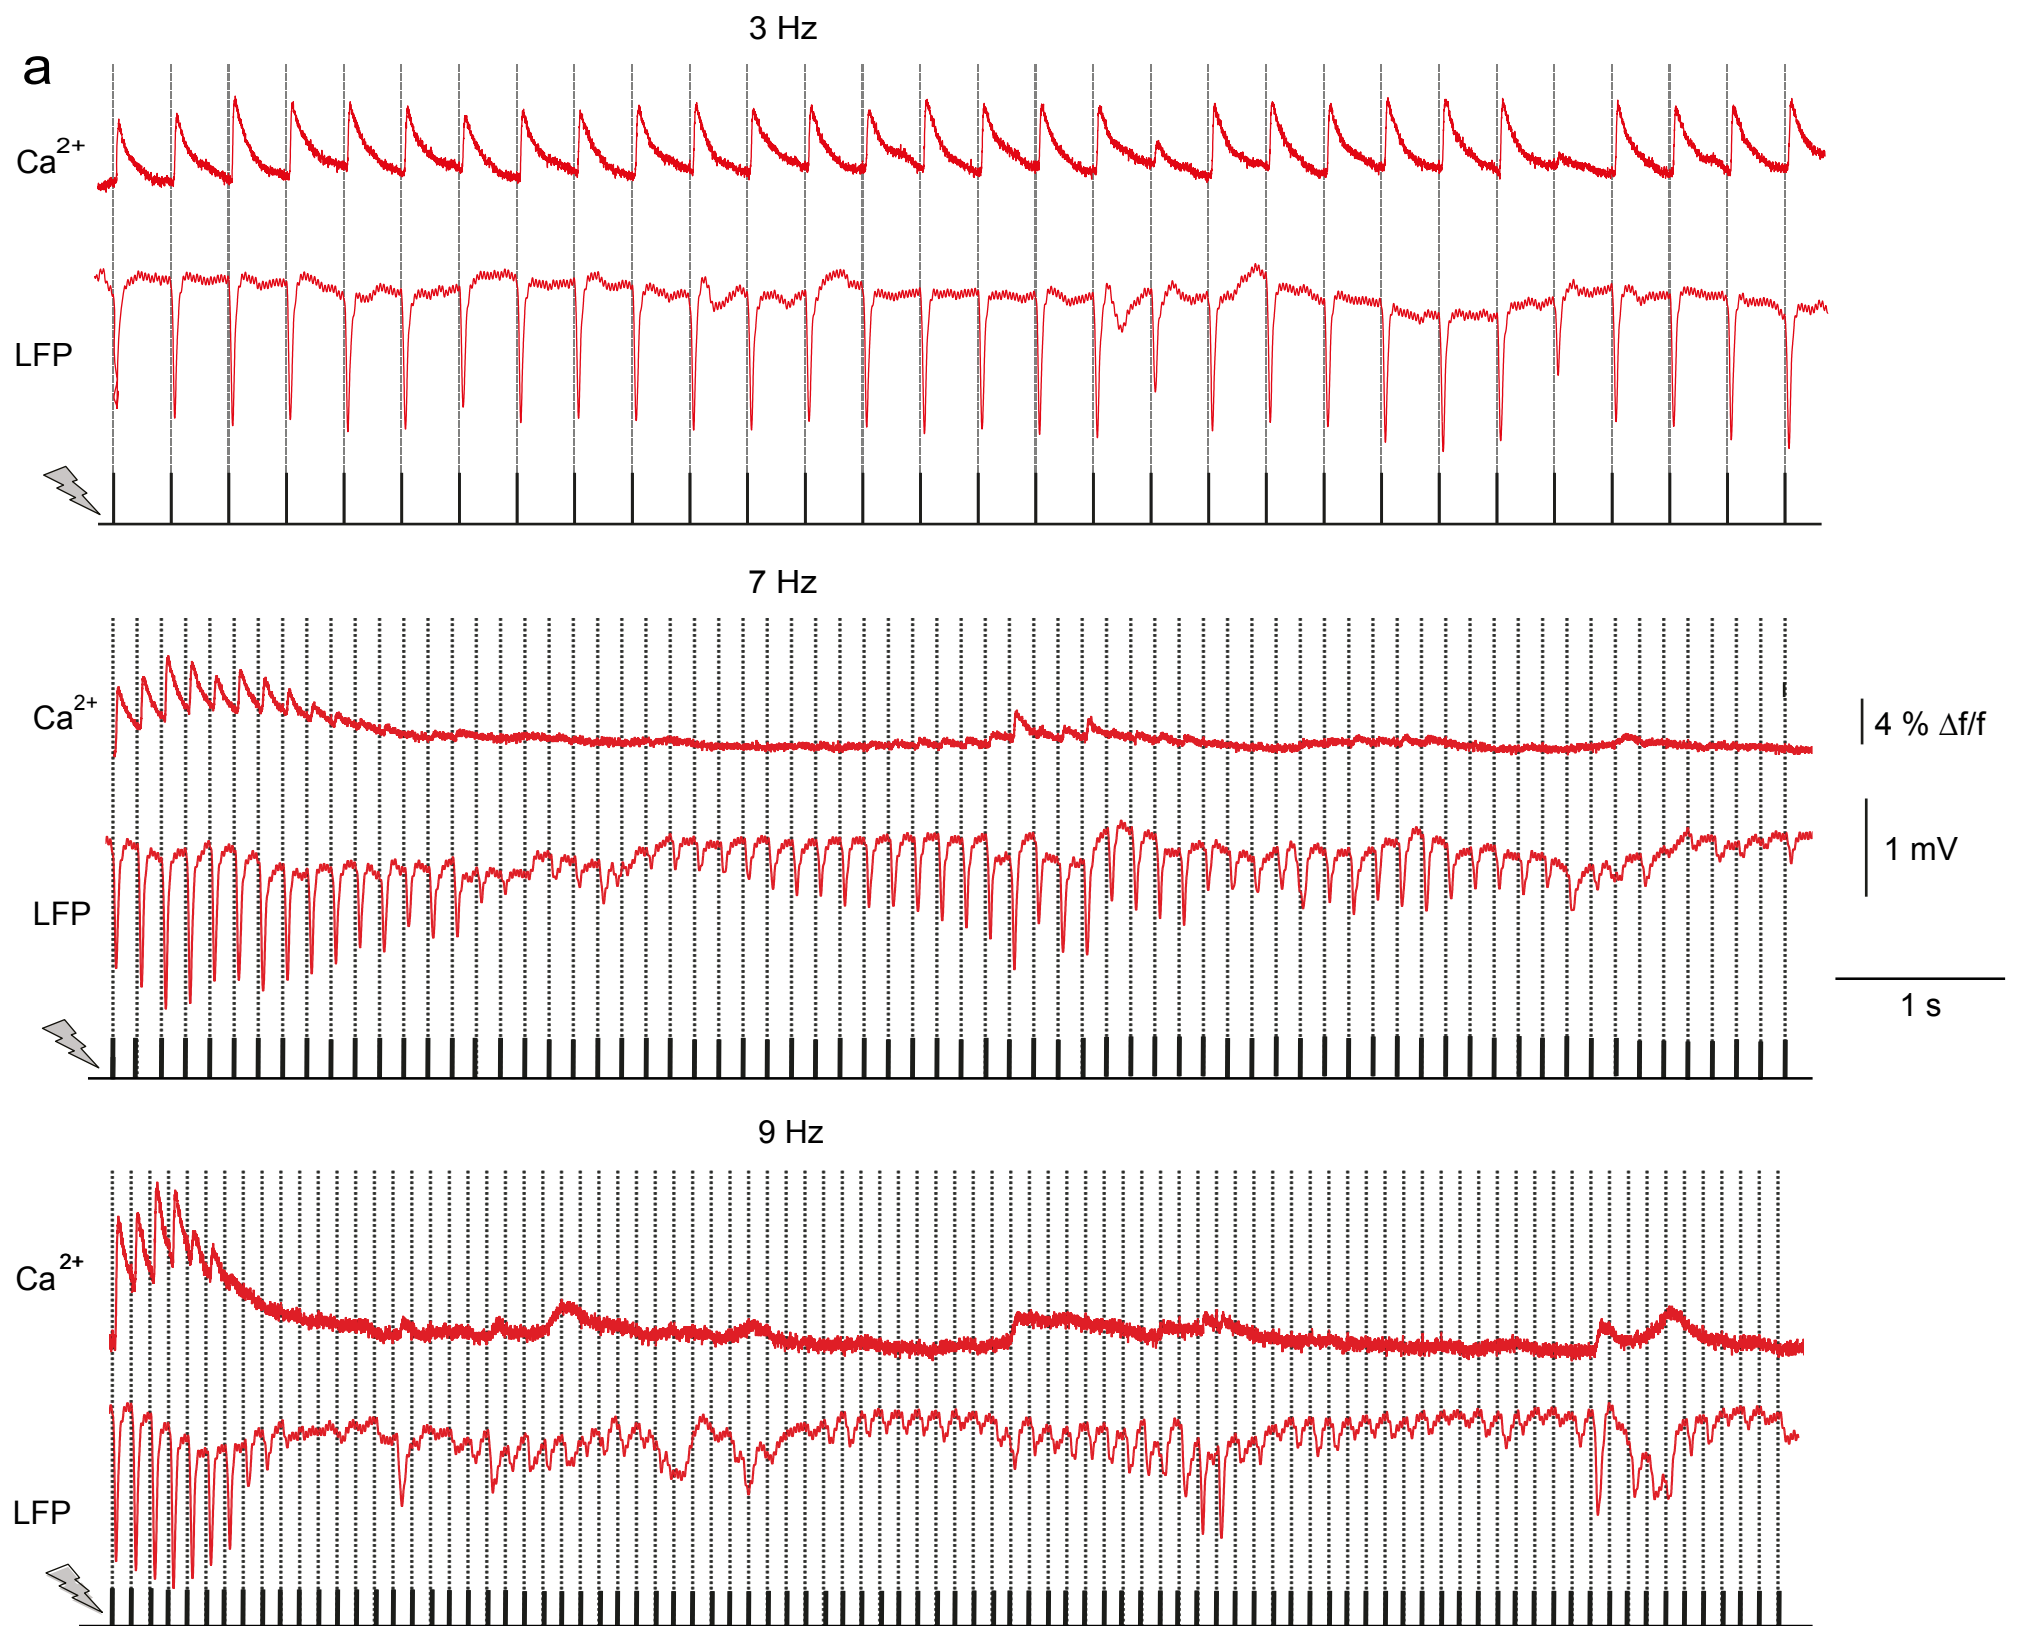

**b**

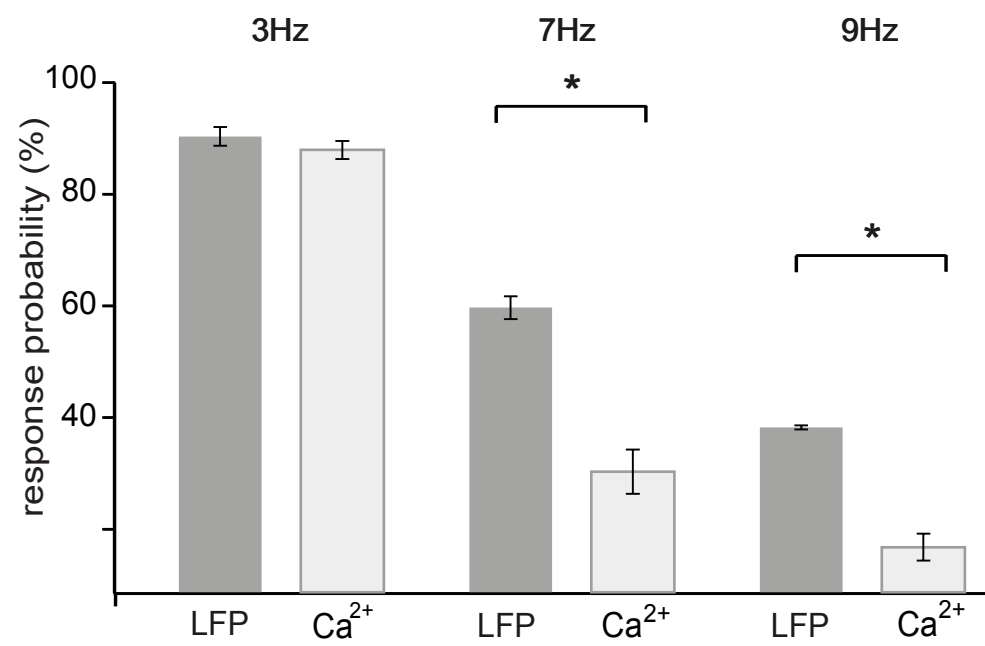

Supplement: SupplFig3.pdf [file SupplFig3.pdf]

# Supplementary Figure 6

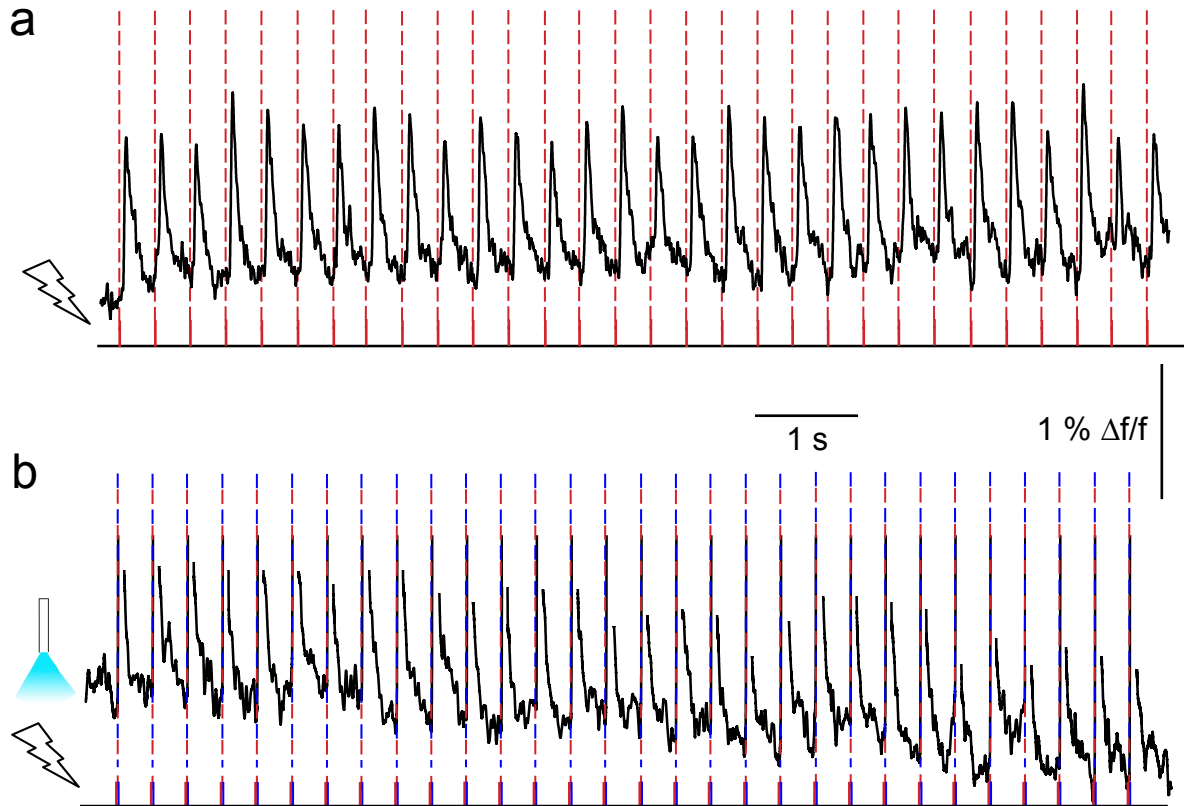

Supplement: SupplFig6.pdf [file SupplFig6.pdf]
